# Supplementary material for: Glucose-triggered dissolution of phenylboronic acid-functionalized cholesterol-based niosomal self-assembly for tuneable drug release
Source: Royal Society of Chemistry journal article supplement (doi:10.1039/c9nj00798a), 2019-01-01
Supplement: c9nj00798a1.pdf [file c9nj00798a1.pdf]

## Electronic Supplementary Information (ESI)

### **Glucose triggered dissolution of phenylboronic acid functionalized cholesterol based niosomal self-assembly for tuneable drug release**

Deep Mandal and Suman Das\*

Department of Chemistry

Jadavpur University

Raja S. C. Mullick Road, Jadavpur

Kolkata 700 032

India

\*Corresponding authors

Address for Correspondence

Tel.: +91 94 3437 3164, +91033 2457 2349

Fax: +91 33 2414 6266

E-mail: SD: [sumandas10@yahoo.com](mailto:sumandas10@yahoo.com)

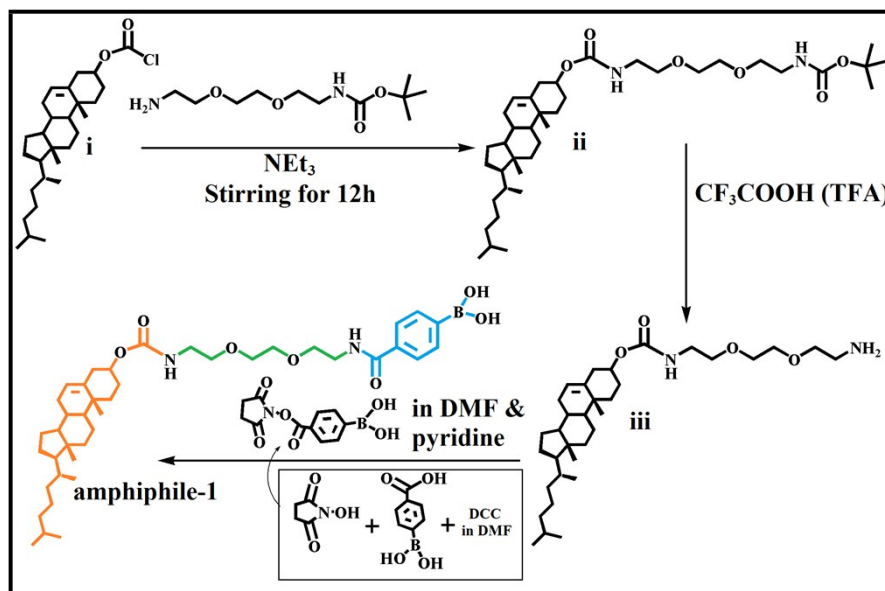

**Scheme S1.** Synthetic procedure for amphiphile-1 and 2.

**$^1\text{H-NMR}$  of amphiphile-1 (500 MHz,  $\text{CDCl}_3$ , 25 °C).**  $\delta$  /ppm = 0.84-1.83 (m, 39H, cholesteryl), 1.78-1.82 and 1.92-1.97 (m, 4H, allylic cholesteryl protons), 2.22-2.29 (broad, 2H,  $-\text{B}(\text{OH})_2$ ), 3.31-3.35 (m, 2H, Chol- $\text{CONH}-\underline{\text{C}}\text{H}_2-\underline{\text{C}}\text{H}_2-$ ), 3.48-3.51 (m, 2H, PBA- $\text{CONH}-\underline{\text{C}}\text{H}_2-\underline{\text{C}}\text{H}_2-$ ), 3.53-3.56 (m, 4H,  $\text{O}-\underline{\text{C}}\text{H}_2-\underline{\text{C}}\text{H}_2-\text{O}-$ ), 3.66-3.72 (m, 4H, Chol- $\text{CONH}-\underline{\text{C}}\text{H}_2-\underline{\text{C}}\text{H}_2-$  and PBA- $\text{CONH}-\underline{\text{C}}\text{H}_2-\underline{\text{C}}\text{H}_2-$ ), 4.30-4.45 (m, 1H,  $-\underline{\text{C}}\text{H}-\text{O}-(\text{CO})-$  of cholesteryl proton), 5.32-5.34 (t, 1H, vinylic proton of cholesteryl group); 7.72-7.88 (m, 4H, phenyl ring of PBA); (Elemental analysis calculated (%) for  $\text{C}_{41}\text{H}_{65}\text{BN}_2\text{O}_7$ : C, 69.48; H, 9.24; N, 3.95; found: C, 69.52; H, 9.26; N, 3.93. MS (ESI):  $m/z$  calculated for  $\text{C}_{41}\text{H}_{65}\text{BN}_2\text{O}_7$ : 708.78; found: 731.76 [ $\text{M}^+ + \text{Na}^+$ ].

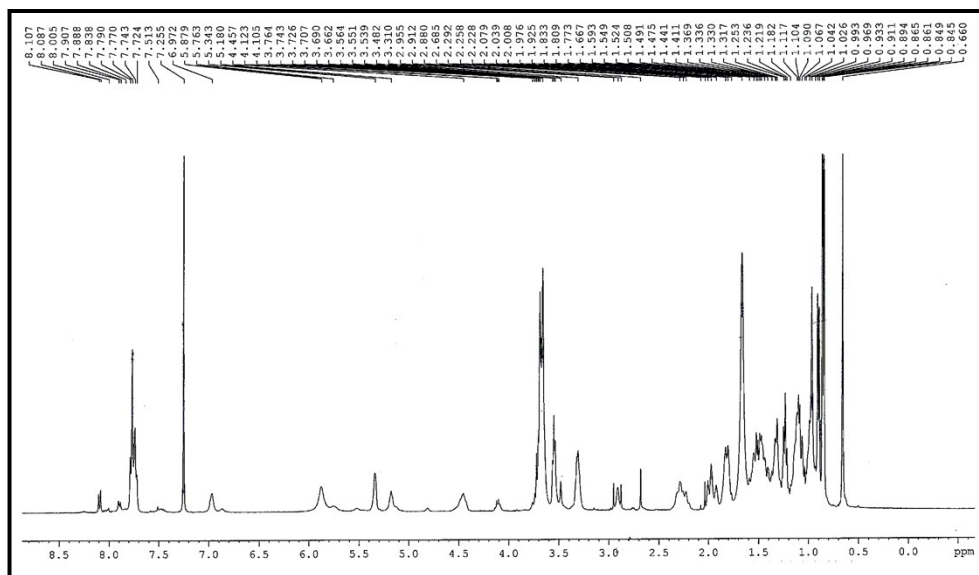

**Fig. S1.**  $^1\text{H-NMR}$  spectra of amphiphile-1 in  $\text{CDCl}_3$

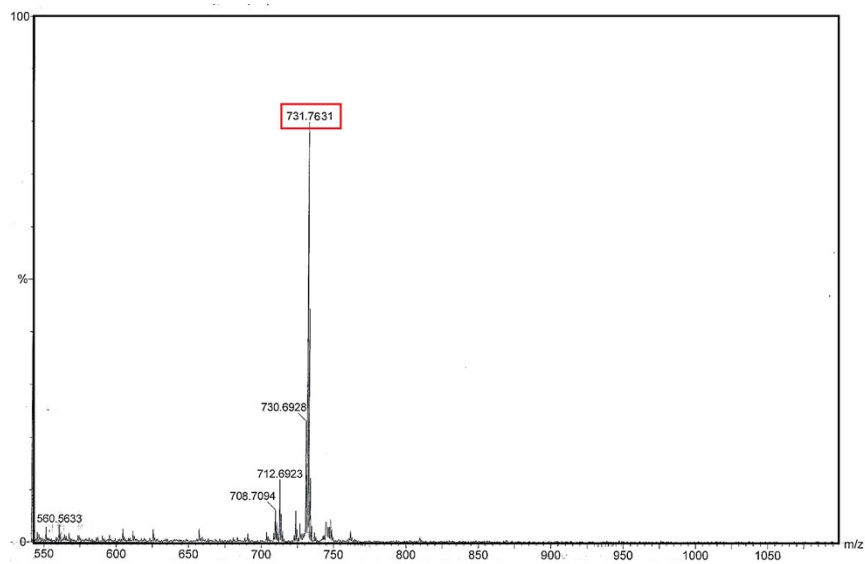

**Fig. S2.** HRMS spectra of amphiphile-1.

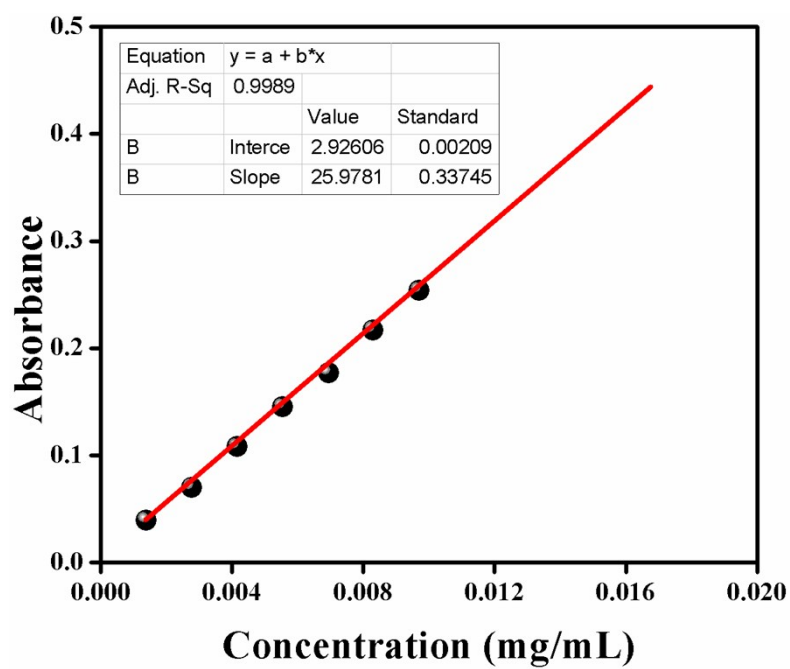

**Fig. S3.** Absorbance vs concentration calibration curve of insulin taken in aqueous PBS buffer of pH=7.4.

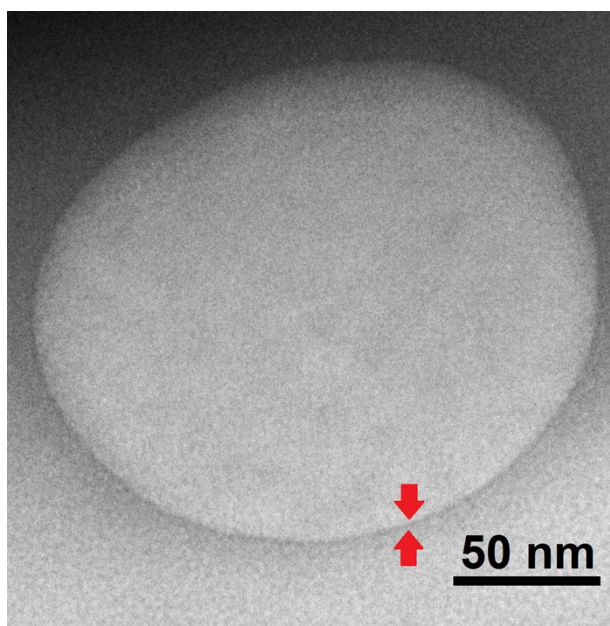

**Fig. S4.** Magnified HR-TEM image of vesicle showing ~2-3 nm thickness of the vesicular wall.

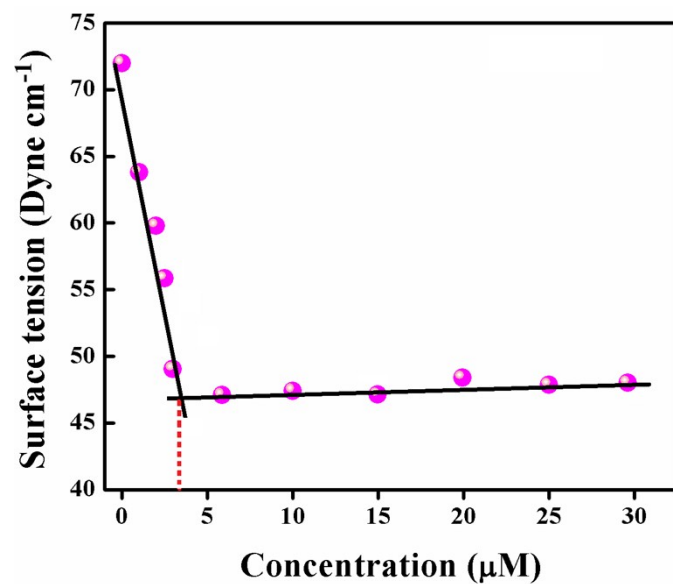

**Fig. S5.** Measurement of Critical aggregation concentration (CAC) of vesicular solution of **1** from surface tension vs concentration plot.

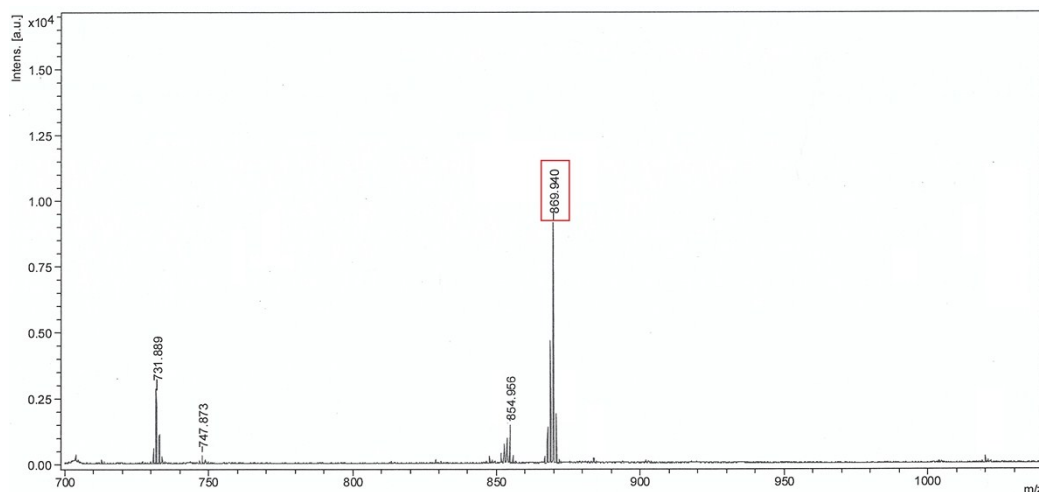

**Fig. S6.** MALDI of amphiphile-**1**+glucose

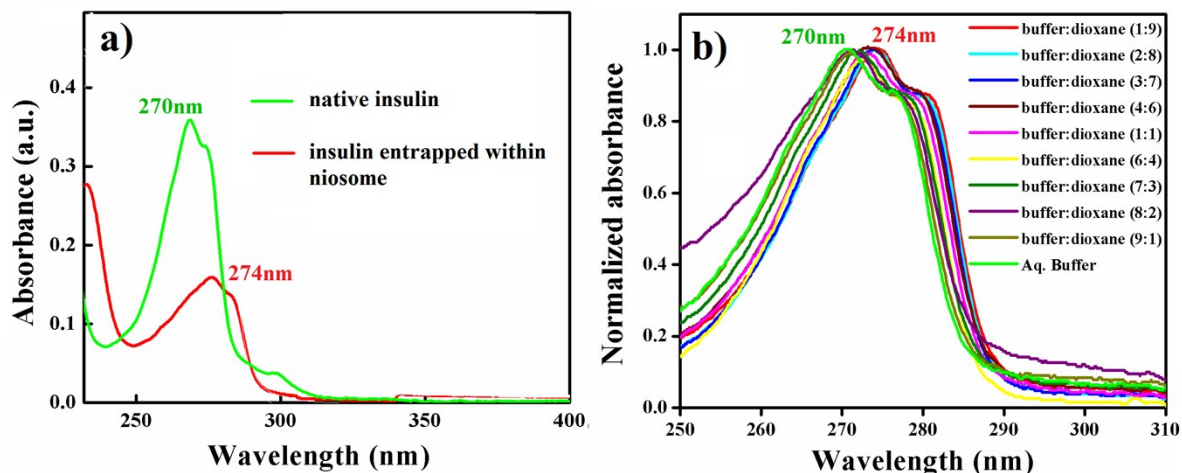

**Fig. S7.** (a) UV absorbance spectra of native insulin taken in aqueous PBS buffer (pH=7.4) and insulin entrapped within the niosome N1; (b) Normalized UV absorbance spectra of insulin taken in aqueous PBS buffer (pH=7.4) and 1,4-dioxane binary solvent mixture at different composition (with varied polarity).

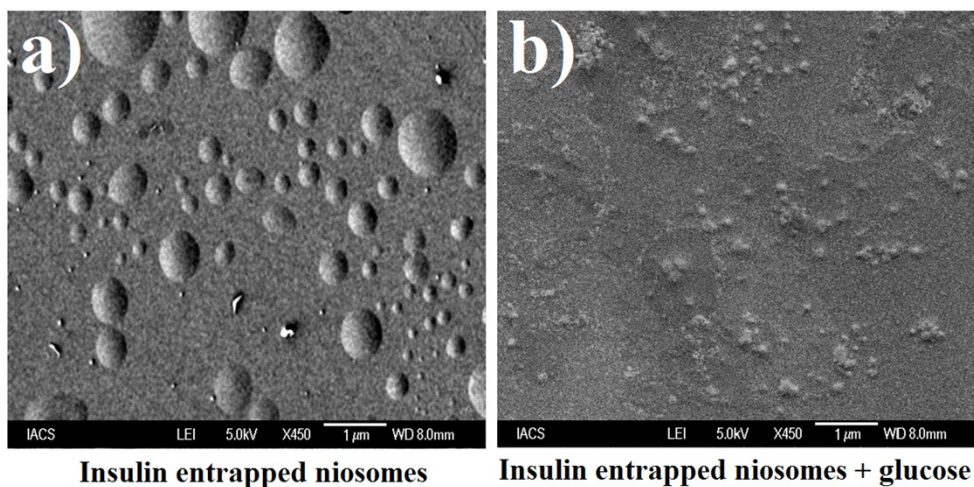

**Fig. S8.** FESEM images of insulin loaded niosomal self-assembly N1 (a) in absence and (b) in presence of glucose.

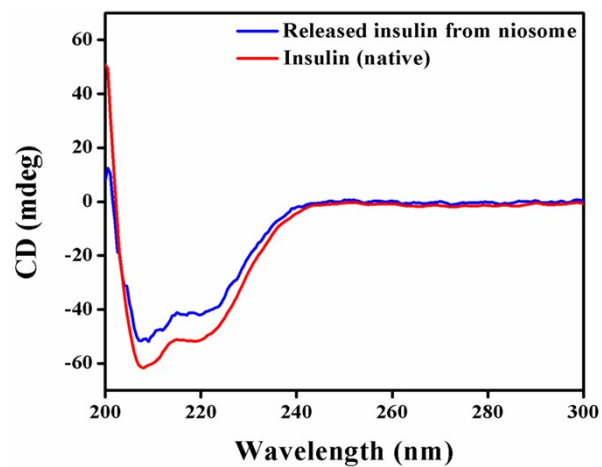

**Fig. S9.** CD spectra of free insulin and released insulin after glucose treatment of the niosome-insulin conjugate.
